# Supplementary material for: Analysis of 16S rRNA Amplicon Sequencing Options on the Roche/454 Next-Generation Titanium Sequencing Platform
Source: PubMed Central journal article supplement (PMC3179495; doi:10.1371/journal.pone.0025263), 2011-09-23
Supplement: pone.0025263.s001.pdf [file pone.0025263.s001.pdf]

**Supplementary Table S1. Sequences obtained via pyrosequencing of 10 environmental samples**

| No. | Sample                     | Method*        | Before trimming |              | After trimming |             |             | Diversity index** |            |                | Classification of reads at domain level |              |  |
|-----|----------------------------|----------------|-----------------|--------------|----------------|-------------|-------------|-------------------|------------|----------------|-----------------------------------------|--------------|--|
|     |                            |                | No. of reads    | No. of reads | % of reads     | Length [nt] | No. of OTUs | H'                | Chao       | Percentage [%] |                                         |              |  |
|     |                            |                |                 |              |                |             |             |                   |            | Bacteria       | Archaea                                 | Unclassified |  |
| 1   | Tibet soil-1               | Method-1 (n=2) | 1242 ± 110      | 1093 ± 112   | 87.9 ± 1.2     | 376 ± 0     | 650 ± 74    | 6.2 ± 0.1         | 1958 ± 164 | 98.4 ± 0.4     | 1.7 ± 0.4                               | 0.0 ± 0.0    |  |
|     |                            | Method-2 (n=2) | 2290 ± 559      | 1988 ± 468   | 87.0 ± 0.8     | 376 ± 0     | 882 ± 147   | 6.3 ± 0.1         | 1888 ± 327 | 98.8 ± 0.3     | 1.2 ± 0.3                               | 0.0 ± 0.0    |  |
|     |                            | Method-3 (n=2) | 3387 ± 601      | 2139 ± 56    | 64.9 ± 9.9     | 376 ± 0     | 837 ± 31    | 6.2 ± 0.1         | 1670 ± 81  | 99.6 ± 0.1     | 0.4 ± 0.1                               | 0.0 ± 0.0    |  |
| 2   | Tibet soil-2               | Method-1 (n=2) | 1808 ± 162      | 1596 ± 135   | 88.3 ± 0.5     | 376 ± 0     | 762 ± 46    | 6.3 ± 0.0         | 1565 ± 114 | 98.6 ± 0.2     | 1.4 ± 0.1                               | 0.1 ± 0.1    |  |
|     |                            | Method-2 (n=2) | 2511 ± 248      | 2199 ± 222   | 87.6 ± 0.2     | 376 ± 0     | 1002 ± 109  | 6.5 ± 0.0         | 2144 ± 108 | 98.3 ± 0.0     | 1.8 ± 0.1                               | 0.1 ± 0.1    |  |
|     |                            | Method-3 (n=2) | 2720 ± 195      | 1762 ± 97    | 65.4 ± 8.2     | 376 ± 0     | 848 ± 50    | 6.3 ± 0.1         | 1968 ± 250 | 99.3 ± 0.2     | 0.7 ± 0.2                               | 0.0 ± 0.0    |  |
| 3   | Drinking water biofilm     | Method-1 (n=2) | 1883 ± 176      | 1663 ± 178   | 88.2 ± 1.2     | 375 ± 0     | 316 ± 26    | 4.6 ± 0.0         | 610 ± 30   | 100.0 ± 0.0    | 0.0 ± 0.0                               | 0.0 ± 0.0    |  |
|     |                            | Method-2 (n=2) | 1575 ± 125      | 1389 ± 110   | 88.2 ± 0.0     | 375 ± 0     | 279 ± 10    | 4.4 ± 0.0         | 538 ± 109  | 99.9 ± 0.0     | 0.1 ± 0.1                               | 0.0 ± 0.0    |  |
|     |                            | Method-3 (n=2) | 2084 ± 46       | 1406 ± 143   | 67.6 ± 8.3     | 375 ± 0     | 296 ± 46    | 4.5 ± 0.1         | 568 ± 71   | 100.0 ± 0.0    | 0.0 ± 0.0                               | 0.0 ± 0.0    |  |
| 4   | TA-bioreactor (Jun06)      | Method-1 (n=2) | 1186 ± 68       | 1050 ± 65    | 88.5 ± 0.4     | 377 ± 0     | 95 ± 11     | 2.9 ± 0.1         | 237 ± 98   | 78.3 ± 0.5     | 21.8 ± 0.6                              | 0.0 ± 0.0    |  |
|     |                            | Method-2 (n=2) | 1695 ± 211      | 1497 ± 189   | 88.3 ± 0.2     | 377 ± 0     | 130 ± 10    | 3.0 ± 0.0         | 270 ± 30   | 78.8 ± 0.2     | 21.2 ± 0.2                              | 0.0 ± 0.0    |  |
|     |                            | Method-3 (n=2) | 1886 ± 67       | 1390 ± 18    | 73.8 ± 3.5     | 377 ± 0     | 110 ± 7     | 2.8 ± 0.0         | 216 ± 43   | 80.9 ± 0.2     | 19.1 ± 0.2                              | 0.0 ± 0.0    |  |
| 5   | TA-bioreactor (Aug10)      | Method-1 (n=2) | 1308 ± 69       | 1155 ± 70    | 88.2 ± 0.7     | 377 ± 0     | 115 ± 11    | 3.2 ± 0.1         | 204 ± 1    | 68.8 ± 0.5     | 31.3 ± 0.4                              | 0.0 ± 0.0    |  |
|     |                            | Method-2 (n=2) | 1499 ± 107      | 1319 ± 85    | 88.0 ± 0.6     | 378 ± 0     | 110 ± 6     | 2.8 ± 0.0         | 222 ± 41   | 58.5 ± 1.5     | 41.5 ± 1.5                              | 0.1 ± 0.1    |  |
|     |                            | Method-3 (n=2) | 2171 ± 28       | 1540 ± 140   | 70.8 ± 5.5     | 378 ± 0     | 143 ± 18    | 2.9 ± 0.0         | 303 ± 100  | 61.3 ± 1.4     | 38.7 ± 1.4                              | 0.1 ± 0.1    |  |
| 6   | Primary anaerobic digester | Method-1 (n=2) | 926 ± 71        | 643 ± 56     | 69.3 ± 0.7     | 375 ± 0     | 230 ± 8     | 4.7 ± 0.0         | 509 ± 8    | 96.3 ± 0.7     | 3.7 ± 0.7                               | 0.1 ± 0.1    |  |
|     |                            | Method-2 (n=2) | 2084 ± 154      | 1351 ± 103   | 64.8 ± 0.1     | 376 ± 0     | 373 ± 25    | 4.8 ± 0.1         | 863 ± 64   | 94.3 ± 0.7     | 5.4 ± 0.4                               | 0.2 ± 0.1    |  |
|     |                            | Method-3 (n=2) | 2737 ± 201      | 1386 ± 252   | 50.2 ± 5.5     | 376 ± 0     | 350 ± 53    | 4.6 ± 0.1         | 760 ± 120  | 95.9 ± 0.6     | 4.0 ± 0.5                               | 0.1 ± 0.1    |  |
| 7   | Groundwater                | Method-1 (n=2) | 559 ± 78        | 488 ± 75     | 87.2 ± 1.3     | 378 ± 0     | 85 ± 11     | 2.8 ± 0.1         | 217 ± 39   | 45.4 ± 0.8     | 54.3 ± 1.0                              | 0.4 ± 0.2    |  |
|     |                            | Method-2 (n=2) | 1536 ± 116      | 1308 ± 93    | 85.2 ± 0.4     | 379 ± 0     | 125 ± 7     | 2.7 ± 0.0         | 255 ± 11   | 37.6 ± 0.6     | 62.0 ± 0.8                              | 0.5 ± 0.2    |  |
|     |                            | Method-3 (n=2) | 2290 ± 100      | 1718 ± 139   | 74.9 ± 2.8     | 379 ± 0     | 144 ± 14    | 2.7 ± 0.0         | 323 ± 5    | 34.7 ± 0.9     | 65.0 ± 0.9                              | 0.4 ± 0.1    |  |
| 8   | Peat soil                  | Method-1 (n=2) | 649 ± 32        | 544 ± 24     | 83.8 ± 0.4     | 378 ± 0     | 283 ± 9     | 5.2 ± 0.0         | 746 ± 48   | 67.3 ± 1.5     | 32.1 ± 1.5                              | 0.7 ± 0.0    |  |
|     |                            | Method-2 (n=2) | 2104 ± 124      | 1752 ± 66    | 83.4 ± 1.8     | 378 ± 0     | 693 ± 27    | 5.8 ± 0.0         | 2129 ± 36  | 71.0 ± 0.1     | 28.2 ± 0.3                              | 0.4 ± 0.4    |  |
|     |                            | Method-3 (n=2) | 2355 ± 201      | 1521 ± 267   | 64.1 ± 5.9     | 379 ± 0     | 285 ± 24    | 4.0 ± 0.0         | 642 ± 21   | 72.1 ± 0.8     | 26.9 ± 0.9                              | 1.1 ± 0.1    |  |
| 9   | Glacial deposit soil-1     | Method-1 (n=2) | 1362 ± 86       | 1161 ± 88    | 85.2 ± 1.1     | 379 ± 1     | 359 ± 20    | 5.1 ± 0.1         | 743 ± 13   | 87.7 ± 1.5     | 9.7 ± 1.6                               | 2.7 ± 0.0    |  |
|     |                            | Method-2 (n=2) | 1337 ± 19       | 1150 ± 13    | 86.0 ± 0.3     | 378 ± 0     | 404 ± 19    | 5.3 ± 0.1         | 936 ± 4    | 90.0 ± 0.8     | 7.7 ± 0.0                               | 2.3 ± 0.4    |  |
|     |                            | Method-3 (n=2) | 2265 ± 126      | 1422 ± 210   | 62.4 ± 5.8     | 378 ± 0     | 367 ± 18    | 4.7 ± 0.6         | 777 ± 81   | 86.6 ± 0.9     | 9.3 ± 0.5                               | 4.1 ± 0.8    |  |
| 10  | Glacial deposit soil-2     | Method-1 (n=2) | 1361 ± 88       | 1164 ± 97    | 85.4 ± 1.6     | 378 ± 0     | 252 ± 25    | 4.2 ± 0.1         | 612 ± 46   | 76.2 ± 0.9     | 22.3 ± 0.9                              | 1.5 ± 0.0    |  |
|     |                            | Method-2 (n=2) | 1563 ± 4        | 1301 ± 39    | 83.2 ± 2.7     | 378 ± 0     | 321 ± 14    | 4.6 ± 0.0         | 889 ± 116  | 78.9 ± 0.1     | 19.7 ± 0.4                              | 1.4 ± 0.3    |  |
|     |                            | Method-3 (n=2) | 2116 ± 70       | 1365 ± 109   | 64.8 ± 7.3     | 378 ± 0     | 279 ± 14    | 4.2 ± 0.0         | 751 ± 27   | 75.2 ± 1.4     | 23.6 ± 1.3                              | 1.3 ± 0.1    |  |

All data are given as an average value of technical replicates (duplicates (n=2)). The values show the variation obtained from the duplicates.

\*Method-1, unidirectional method using Roche Titanium LIB-A kit; Method-2, unidirectional sequencing method using Roche Titanium LIB-A kit with dual primer sets (515F-FA-MIDs & 909R-FB and 515F-FB-MIDs and 909R-FA); Method-3, unidirectional sequencing method using Roche Titanium LIB-L kit

\*\*Diversity indexes were based on a taxonomic cutoff of 97%
